# Supplementary material for: Identification of miRNA-target gene regulatory networks in liver fibrosis based on bioinformatics analysis
Source: PeerJ. 2021 Aug 6;9:e11910. doi: 10.7717/peerj.11910 (PMC8351572; doi:10.7717/peerj.11910)
Supplement: Supplemental Information 1 [file peerj-09-11910-s001.xlsx]

## Sheet: Fig. 8
Figure 8B				Figure 8C
Protein expression of α-SMA in LX2				Expression levels of miRNAs in LX2
Qroup	Relative Quantity			Qroup	miR-146b-5p	miR-150-5p	miR-224-3p	miR-3135b	miR-3195	miR-4725-3p
Vehicle-1	1			Vehicle-1	1	1	1	1	1	1
Vehicle-2	0.83			Vehicle-2	1.26	1.19	1.16	1.37	1.19	0.65
Vehicle-3	1.18			Vehicle-3	0.8	0.85	0.88	0.99	0.94	1.13
TGF-β1-1	2.8			TGF-β1-1	1.79	2.07	2.72	1.24	1.13	0.75
TGF-β1-2	2.69			TGF-β1-2	1.77	2.95	3.11	1.05	1.19	1.33
TGF-β1-3	3.4			TGF-β1-3	2.37	1.98	2.13	1.77	0.54	1.68
				Figure 8D
				Expression levels of miRNAs in LX2
				Qroup	miR-1234-3p	miR-30b-3p	miR-3162-3p	miR-548aj-3p	miR-548x-3p	miR-548z	miR-890
				Vehicle-1	1	1	1	1	1	1	1
				Vehicle-2	0.79	1.21	1.01	0.66	0.76	0.78	1.14
				Vehicle-3	1.23	0.92	0.68	1.32	1.3	1.28	0.95
				TGF-β1-1	0.48	0.15	0.6	1.38	1.4	1.38	0.4
				TGF-β1-2	0.35	0.56	0.51	0.61	1.44	1.32	0.46
				TGF-β1-3	0.43	0.33	0.47	0.67	0.87	0.76	0.56
